# Supplementary material for: A comparative bioinformatic analysis of C9orf72
Source: PubMed Central journal article supplement (PMC5822839; doi:10.7717/peerj.4391), 2018-02-19
Supplement: peerj-06-4391-s006.pdf [file peerj-06-4391-s006.pdf]

<html><head></head><body><pre style="word-wrap: break-word; white-space: pre-wrap;">#####

```
# Program: needle
# Rundate: Wed 24 Jan 2018 13:29:59
# Commandline: needle
# -auto
# -stdout
# -asequence emboss_needle-I20180124-132957-0052-68239585-plm.asequence
# -bsequence emboss_needle-I20180124-132957-0052-68239585-plm.bsequence
# -datafile EDNAFULL
# -gapopen 10.0
# -gapextend 0.5
# -endopen 10.0
# -endextend 0.5
# -aformat3 pair
# -snucleotide1
# -snucleotide2
# Align_format: pair
# Report_file: stdout
#####
```

```
#=====
#
# Aligned_sequences: 2
# 1: human
# 2: fugu
# Matrix: EDNAFULL
# Gap_penalty: 10.0
# Extend_penalty: 0.5
#
# Length: 6675
# Identity: 419/6675 ( 6.3%)
# Similarity: 419/6675 ( 6.3%)
# Gaps: 6152/6675 (92.2%)
# Score: 656.5
#
#
#=====
```

|       |     |                                                     |     |
|-------|-----|-----------------------------------------------------|-----|
| human | 1   | gtgtgtcagccgtccctgctgcccggttgcttctcttttgggggcggggt  | 50  |
| fugu  | 1   | -----                                               | 0   |
| human | 51  | ctagcaagagcaggtgtgggttaggaggtgtgtgtttttgtttttccca   | 100 |
| fugu  | 1   | -----                                               | 0   |
| human | 101 | ccctctctccccactacttgctctcacagtactcgctgagggtgaacaag  | 150 |
| fugu  | 1   | -----                                               | 0   |
| human | 151 | aaaagacctgataaagattaaccagaagaaaacaaggagggaacaaccg   | 200 |
| fugu  | 1   | -----                                               | 0   |
| human | 201 | cagcctgtagcaagctctggaactcaggagtcgcgcgctaggggccgggg  | 250 |
| fugu  | 1   | -----                                               | 0   |
| human | 251 | ccggggccggggcggtggtcggggcgggcccgggggcgggcccggggcggg | 300 |
| fugu  | 1   | -----                                               | 0   |
| human | 301 | gctgcggttgcggtgcctgcccgcggcggcggaggcgcaggcggtggc    | 350 |
| fugu  | 1   | -----                                               | 0   |
| human | 351 | gagtgggtgagtgaggaggcggcatcctggcgggtggctgtttggggttc  | 400 |
| fugu  | 1   | -----                                               | 0   |
| human | 401 | ggctgccgggaagaggcgcgggtagaagcgggggctctcctcagagctcg  | 450 |
| fugu  | 1   | -----                                               | 0   |

|       |      |                                                        |      |
|-------|------|--------------------------------------------------------|------|
| human | 451  | acgcattttttacttttccctctcattttctctgaccgaagctggggtgtcggg | 500  |
| fugu  | 1    | -----                                                  | 0    |
| human | 501  | ctttcgcctctagcgcactgggtggaattgcctgcatccgggccccgggctt   | 550  |
| fugu  | 1    | -----                                                  | 0    |
| human | 551  | cccggcggcggcggcggcggcggcggcggcgcagggacaagggatggggatct  | 600  |
| fugu  | 1    | -----                                                  | 0    |
| human | 601  | ggcctcttccttgctttcccgccctcagtacccgagctgtctccttcccg     | 650  |
| fugu  | 1    | -----                                                  | 0    |
| human | 651  | gggaccgcgctgggagcgcctgccgctgcgggctcgagaaaaggagcctcg    | 700  |
| fugu  | 1    | -----                                                  | 0    |
| human | 701  | ggtactgagaggcctcgcctgggggaaggccggagggtgggcggcgcgcg     | 750  |
| fugu  | 1    | -----                                                  | 0    |
| human | 751  | gcttctgcggaccaagtcggggttcgctaggaacccgagacggtcctgc      | 800  |
| fugu  | 1    | -----                                                  | 0    |
| human | 801  | cggcgaggagatcatgcgggatgagatgggggtgtggagacgcctgcaca     | 850  |
| fugu  | 1    | -----                                                  | 0    |
| human | 851  | atrtcagcccaagcttctagagagtgggtgatgacttgcatatgagggcag    | 900  |
| fugu  | 1    | -----                                                  | 0    |
| human | 901  | caatgcaagtcgggtgtgctccccattctgtgggacatgacctggttgctt    | 950  |
| fugu  | 1    | -----                                                  | 0    |
| human | 951  | cacagctccgagatgacacagacttgcttaaaggaagtgactattgtgac     | 1000 |
| fugu  | 1    | -----                                                  | 0    |
| human | 1001 | ttgggcatcacttgactgatggtaatcagttgtctaaagaagtgcacaga     | 1050 |
| fugu  | 1    | -----                                                  | 0    |
| human | 1051 | ttacatgtccgtgtgctcattgggtctatctggccgcgttgaacaccacc     | 1100 |
| fugu  | 1    | -----                                                  | 0    |
| human | 1101 | aggctttgtattcagaaacaggaggaggctcctgcactttcccaggagg      | 1150 |
| fugu  | 1    | -----                                                  | 0    |
| human | 1151 | gtggccctttcagatgcaatcgagattgtaggctctgggagagtagttg      | 1200 |
| fugu  | 1    | -----                                                  | 0    |
| human | 1201 | cctggttgtggcagttggtaaatttctattcaaacagttgccatgcacca     | 1250 |
| fugu  | 1    | -----                                                  | 0    |
| human | 1251 | gttgttcacaacaagggtagcgaatctgtctggcattacttctacttttg     | 1300 |
| fugu  | 1    | -----                                                  | 0    |
| human | 1301 | tacaaaggatcaaaaaaaaaaagataactgttaagatatgatttttctca     | 1350 |
| fugu  | 1    | -----                                                  | 0    |
| human | 1351 | gactttgggaaacttttaacataatctgtgaatatcacagaaacaagact     | 1400 |
| fugu  | 1    | -----                                                  | 0    |

|       |      |                                                         |      |
|-------|------|---------------------------------------------------------|------|
| human | 1401 | atcatataggggatattaataacctggagtcagaataacttgaatacgggt     | 1450 |
| fugu  | 1    | -----                                                   | 0    |
| human | 1451 | gtcatttgacacgggcattggtgtcaccacctctgccaaggcctgccact      | 1500 |
| fugu  | 1    | -----                                                   | 0    |
| human | 1501 | ttaggaaaaccctgaatcagttggaaactgctacatgctgatagtacatc      | 1550 |
| fugu  | 1    | -----                                                   | 0    |
| human | 1551 | tgaacaagaacgagagtaattaccacattccagattgttcactaagcca       | 1600 |
| fugu  | 1    | -----                                                   | 0    |
| human | 1601 | gcatttacctgctccaggaaaaaattacaagcaccttatgaagttgataa      | 1650 |
| fugu  | 1    | -----                                                   | 0    |
| human | 1651 | aatatthttgthttggctatgthttggcactccacaatthgctthtcagagaaac | 1700 |
| fugu  | 1    | -----                                                   | 0    |
| human | 1701 | aaagtaaaccaaggaggacttctgthttttcaagtctgccctcgggttcta     | 1750 |
| fugu  | 1    | -----                                                   | 0    |
| human | 1751 | ttctacgttaattagatagthttcccaggaggactaggttagcctacctatt    | 1800 |
| fugu  | 1    | -----                                                   | 0    |
| human | 1801 | gtctgagaaacttggaactgtgagaaatggccagatagtgatatgaactt      | 1850 |
| fugu  | 1    | -----gtac--                                             | 4    |
| human | 1851 | caccttccagtcttccctgatgthtgaagattgagaaagtgthtgaactt      | 1900 |
| fugu  | 5    | --cctt-----tgat-ttcatga-----gthtagctt                   | 27   |
| human | 1901 | tctggtactgtaaacagthtca----ctgtccttgaagthgtcctcctgggcag  | 1946 |
| fugu  | 28   | thttg-----gthtcaggcggggacatagaagt-----cgca-             | 58   |
| human | 1947 | ctcctgthtggaaa-gthggacggtthtaggatcctgc--thtctctthggg    | 1993 |
| fugu  | 59   | -----tgcaaactg----ggtth--gagctthcattthtctcctt---        | 90   |
| human | 1994 | ctgggagaaaaataaacagcatggttacaagtattgagagccaggttgag      | 2043 |
| fugu  | 91   | -----ata-----                                           | 93   |
| human | 2044 | aagthggcttacacctgt----aatgccagagctthtgggaggcggaggca     | 2089 |
| fugu  | 94   | -----gactgacctthttttcaatgcggga--thtg-----a              | 124  |
| human | 2090 | agaggatcacttgaagccaggagthtcaagctcaacctgggcaactagac      | 2139 |
| fugu  | 125  | agagtha-----agha---caa-----                             | 137  |
| human | 2140 | cctgtctctacaaaaaattaaaaacttagccgggctggtgatgtgcacc       | 2189 |
| fugu  | 138  | -----taataact-----cgt-gthgagth-----                     | 155  |
| human | 2190 | thtagthcct-agthactthgggaggctgaggcaggagthcattthgagc--    | 2236 |
| fugu  | 156  | ----ctcctcag-----thgaag-aggaggg-catgthgatcat            | 186  |
| human | 2237 | --ccaagagthtgaagthaccgagagctatgatcctgccagthcattcca      | 2284 |
| fugu  | 187  | agccaagag-----atg-----aatgcgt-----                      | 205  |
| human | 2285 | gcctggatgacaaaacgagacctgtctctaaaaaacaagaagthgagggc      | 2334 |

|       |      |                                                                        |      |
|-------|------|------------------------------------------------------------------------|------|
| fugu  | 206  | ---tgg-----ccttt-----gc                                                | 215  |
| human | 2335 | tttatgattgtagaattttcactacaatagcagtggaaccaaccacctttc                    | 2384 |
|       |      | .                                   .                       .          |      |
| fugu  | 216  | tgtat-----tag-----gaagtgg-----ttgc                                     | 234  |
| human | 2385 | taaataccaatcaggaagagatggttgattttttaacagacgtttaaag                      | 2434 |
|       |      | .           .       . . .    ..     . .                                |      |
| fugu  | 235  | -----agatgagatggtgg--ttgtcatcagtggtttgatg                              | 268  |
| human | 2435 | aaaagcaaacctcaaacttagcactctactaacagtttt-agcagatg                       | 2483 |
|       |      | . . .                           .. .          .                        |      |
| fugu  | 269  | -----acatcatcaaac-----ctgccatttttcaaca----                             | 296  |
| human | 2484 | ttaattaatgtaatcatgtctgcatgtatgggattatttccagaaagtgt                     | 2533 |
|       |      | .                .                                                     |      |
| fugu  | 297  | -tcatt-----tcatggct-----                                               | 309  |
| human | 2534 | attgggaaacctctcatgaaccctgtgagcaagccaccgtctcactcaat                     | 2583 |
|       |      | .   .   .        .   .                                                 |      |
| fugu  | 310  | -ttgg-----tgtcctggacactgt--tcaggccac-----t                             | 338  |
| human | 2584 | ttgaatcttggcttccctcaaagactggctaatagtttggtaactctctg                     | 2633 |
|       |      | .                               .              .                       |      |
| fugu  | 339  | t----cctt--cttccc-----ctgac-----tttgct----tctg                         | 364  |
| human | 2634 | ---gagtagacagcactacatgtacgtaagataggtacat-----                          | 2670 |
|       |      | .        .                             .    .   .                      |      |
| fugu  | 365  | aaagtgta-aaagca--aca-----aaaatatgtccatctgcaatgaa                       | 404  |
| human | 2671 | aaacaactattggttttgagctgattttt-----tcagctgcatttgc                       | 2714 |
|       |      | .             ..            .             .        ..                  |      |
| fugu  | 405  | aagcaa-----gtgatgagct--ttgtttctgagatcggc--caagagc                      | 444  |
| human | 2715 | atgtatggatttttctcaccaaag-acgat--gacttcaagtattagtaa                     | 2761 |
|       |      | .                     .         .                . .   .  ..           |      |
| fugu  | 445  | a---ctgg--ttttc---ctaaagttctatgggac--caacaagtagcgg                     | 484  |
| human | 2762 | aataattgtacagc-tctcctgattat-acttctctgt-----gacatt                      | 2803 |
|       |      | . .                  .                   . .             . .    .      |      |
| fugu  | 485  | aatctt-----gcttcttct--ttataacttatatgtcctaagata-c                       | 525  |
| human | 2804 | tcatttcccaggctatttcttttgtaggatttaaaact-----aagcaa                      | 2848 |
|       |      | .                          .                                         . |      |
| fugu  | 526  | tcatatcc-----ttgtcag-----aaactgcttgaatcaa                              | 556  |
| human | 2849 | ttcagtatgatctttgtcct-tcattttctttcttattctttttgtttgt                     | 2897 |
|       |      | .   .         .      ..                                                |      |
| fugu  | 557  | tt-----gttttctcacatttttag-----                                         | 576  |
| human | 2898 | ttgtttgtttgtttttttcttgaggcagagtctctctctgtcgcccaggc                     | 2947 |
| fugu  | 577  | -----                                                                  | 576  |
| human | 2948 | tggagtgcagtgggccatctcagctcattgcaacctctgccacctccgg                      | 2997 |
| fugu  | 577  | -----                                                                  | 576  |
| human | 2998 | gttcaagagattctcctgcctcagcctcccagtagctgggattacaggt                      | 3047 |
| fugu  | 577  | -----                                                                  | 576  |
| human | 3048 | gtccaccaccaccccggctaattttttgtatttttagtagaggtggggt                      | 3097 |
| fugu  | 577  | -----                                                                  | 576  |
| human | 3098 | ttcaccatgttggccaggctggtcttgagctcctgacctcaggtgatcca                     | 3147 |
| fugu  | 577  | -----                                                                  | 576  |
| human | 3148 | cctgcctcggcctaccaagagctgggataaacaggtgtgacctccatgc                      | 3197 |
| fugu  | 577  | -----                                                                  | 576  |
| human | 3198 | ccggcccatttttttttcttattctgttaggagtgagagtgtaactagc                      | 3247 |

|       |      |                                                     |      |
|-------|------|-----------------------------------------------------|------|
| fugu  | 577  | -----                                               | 576  |
| human | 3248 | agtataatagttcaattttcacaacgtggtaaaagtttccctataattca  | 3297 |
| fugu  | 577  | -----                                               | 576  |
| human | 3298 | atcagattttgctccagggttcagttctgttttaggaaataacttttattt | 3347 |
| fugu  | 577  | -----                                               | 576  |
| human | 3348 | tcagtttaatgatgaaatattagagttgtaatattgcctttatgattatc  | 3397 |
| fugu  | 577  | -----                                               | 576  |
| human | 3398 | cacctttttaacctaaaagaatgaaagaaaaatatgtttgcaatataatt  | 3447 |
| fugu  | 577  | -----                                               | 576  |
| human | 3448 | ttatggttgtatgttaacttaattcattatgttggcctccagtttgctgt  | 3497 |
| fugu  | 577  | -----                                               | 576  |
| human | 3498 | tgttagttatgacagcagtagtgtcattaccatttcaattcagattacat  | 3547 |
| fugu  | 577  | -----                                               | 576  |
| human | 3548 | tcctatatttgatcattgtaaactgactgcttacattgtattaaaaacag  | 3597 |
| fugu  | 577  | -----                                               | 576  |
| human | 3598 | tgatattttaagaagctgtacggcttataatctagtgctgtctcttaag   | 3647 |
| fugu  | 577  | -----                                               | 576  |
| human | 3648 | actattaaattgatacaacatatttaaaagtaaataattacctaaatgaat | 3697 |
| fugu  | 577  | -----                                               | 576  |
| human | 3698 | ttttgaaattacaaatacacgtgttaaaactgtcgttggttcaaccatt   | 3747 |
| fugu  | 577  | -----                                               | 576  |
| human | 3748 | tctgtacataacttagagttaactgttttgccaggctctgtatgcctactc | 3797 |
| fugu  | 577  | -----                                               | 576  |
| human | 3798 | ataatatgataaaagcactcatctaatgctctgtaaataagaagtcagtgc | 3847 |
| fugu  | 577  | -----                                               | 576  |
| human | 3848 | tttccatcagactgaactctcttgacaagatgtggatgaaattctttaag  | 3897 |
| fugu  | 577  | -----                                               | 576  |
| human | 3898 | taaaattgtttactttgtcatacatttacagatcaaagttagctcccaa   | 3947 |
| fugu  | 577  | -----                                               | 576  |
| human | 3948 | agcaatcatatggcaaagataggtatatcatagtttgcctattagctgct  | 3997 |
| fugu  | 577  | -----                                               | 576  |
| human | 3998 | ttgtattgctattattataaatagacttcacagttttagacttgcttagg  | 4047 |
| fugu  | 577  | -----                                               | 576  |
| human | 4048 | tgaaattgcaattctttttactttcagtcttagataacaagtcttcaatt  | 4097 |
| fugu  | 577  | -----                                               | 576  |
| human | 4098 | atagtacaatcacacattgcttaggaatgcatcattaggcgattttgtca  | 4147 |
| fugu  | 577  | -----                                               | 576  |

|       |      |                                                     |      |
|-------|------|-----------------------------------------------------|------|
| human | 4148 | ttatgcaaacatcatagagtgacttacacaaacctagatagtatagcct   | 4197 |
| fugu  | 577  | -----                                               | 576  |
| human | 4198 | ttatgtacctaggccgtatggtatagtctggtgctcctaggccacaaacc  | 4247 |
| fugu  | 577  | -----                                               | 576  |
| human | 4248 | tgtacaactgttactgtactgaatactatagacagttgtaacacagtgg   | 4297 |
| fugu  | 577  | -----                                               | 576  |
| human | 4298 | aaatatttatctaaatatatgcaaacagagaaaagggtacagtaaaagt   | 4347 |
| fugu  | 577  | -----                                               | 576  |
| human | 4348 | ggtataaaagataatggtatacctgtgtagggcacttaccacgaatggag  | 4397 |
| fugu  | 577  | -----                                               | 576  |
| human | 4398 | cttgcaggactagaagttgctctgggtgagtcagtgagtgagtggtgat   | 4447 |
| fugu  | 577  | -----                                               | 576  |
| human | 4448 | taatgtgaaggcctagaacactgtacaccactgtagactataaacacagt  | 4497 |
| fugu  | 577  | -----                                               | 576  |
| human | 4498 | acgctgaagctacaccaaatttatcttaacagtttttcttcaataaaaa   | 4547 |
| fugu  | 577  | -----                                               | 576  |
| human | 4548 | ttataactttttaactttgtaaactttttaattttttaacttttaaaata  | 4597 |
| fugu  | 577  | -----                                               | 576  |
| human | 4598 | cttagcttgaaacacaaatacattgtatagctatacaaaaatatttttc   | 4647 |
| fugu  | 577  | -----                                               | 576  |
| human | 4648 | tttgtatccttattctagaagcttttttctattttctatttttaattttt  | 4697 |
| fugu  | 577  | -----                                               | 576  |
| human | 4698 | ttttttacttgttagtcgtttttgtaaaaactaaaacacacacactttc   | 4747 |
| fugu  | 577  | -----                                               | 576  |
| human | 4748 | acctaggcatagacaggattaggatcatcagtatcactcccttccacctc  | 4797 |
| fugu  | 577  | -----                                               | 576  |
| human | 4798 | actgccttccacctccacatcttgtcccactggaaggtttttaggggcaa  | 4847 |
| fugu  | 577  | -----                                               | 576  |
| human | 4848 | taacacacatgtagctgtcacctatgataacagtgcttttctgttgaatac | 4897 |
| fugu  | 577  | -----                                               | 576  |
| human | 4898 | ctcctgaaggacttgccctgaggctgttttacatttaacttaaaaaaaaa  | 4947 |
| fugu  | 577  | -----                                               | 576  |
| human | 4948 | aaagtagaaggagtgcaactctaaaataacaataaaaggcatagtatagt  | 4997 |
| fugu  | 577  | -----                                               | 576  |
| human | 4998 | aatacataaaccagcaatgtagtagtttattatcaagtgttgtacactgt  | 5047 |
| fugu  | 577  | -----                                               | 576  |
| human | 5048 | aataattgtatgtgctataactttaaataacttgcaaatagtactaagac  | 5097 |
| fugu  | 577  | -----                                               | 576  |

|       |      |                                                    |      |
|-------|------|----------------------------------------------------|------|
| human | 5098 | cttatgatggttacagtgctcactaaggcaatagcatattttcaggccat | 5147 |
| fugu  | 577  | -----                                              | 576  |
| human | 5148 | tgtaatctaattgggactaccatcatatatgcagctaccattgactgaaa | 5197 |
| fugu  | 577  | -----                                              | 576  |
| human | 5198 | cgttacatggcacataactgtatgtgcaagaatgatttgttttacattaa | 5247 |
| fugu  | 577  | -----                                              | 576  |
| human | 5248 | tatcacataggatgtaccttttagagtggtatgtttatgtggattaaga  | 5297 |
| fugu  | 577  | -----                                              | 576  |
| human | 5298 | tgtacaagttgagcaaggggaccaagagccctgggttctgtcttgatgt  | 5347 |
| fugu  | 577  | -----                                              | 576  |
| human | 5348 | gagcgtttatgttcttctcctcatgtctgttttctcattaaattcaaagg | 5397 |
| fugu  | 577  | -----                                              | 576  |
| human | 5398 | cttgaacgggccctatttagcccttctgttttctacgtgttctaaataac | 5447 |
| fugu  | 577  | -----                                              | 576  |
| human | 5448 | taaagcttttaaattctagccatttagtgtagaactctctttgcagtgat | 5497 |
| fugu  | 577  | -----                                              | 576  |
| human | 5498 | gaaatgctgtattggtttcttggttagcatattaaatatttttatctttg | 5547 |
| fugu  | 577  | -----                                              | 576  |
| human | 5548 | tcttgatacttcaatgtcgttttaaacatcaggatcgggcttcagtattc | 5597 |
| fugu  | 577  | -----                                              | 576  |
| human | 5598 | tcataaccagagagttcactgaggatacaggactgtttgccattttttg  | 5647 |
| fugu  | 577  | -----                                              | 576  |
| human | 5648 | ttatggctccagacttgtggatatttccatgtctttttttttttttttt  | 5697 |
| fugu  | 577  | -----                                              | 576  |
| human | 5698 | tttgaccttttagcggctttaagatatttctgttggttaggtgttgatta | 5747 |
| fugu  | 577  | -----                                              | 576  |
| human | 5748 | cttttctaagattacttaacaaagcaccacaaactgagtggttttaaca  | 5797 |
| fugu  | 577  | -----                                              | 576  |
| human | 5798 | acagcaatttattctctcacaattctagaagctagaagtccgaaatcaaa | 5847 |
| fugu  | 577  | -----                                              | 576  |
| human | 5848 | gtggtgacaggggcatgatcttcaagagagaagactctttccttgctct  | 5897 |
| fugu  | 577  | -----                                              | 576  |
| human | 5898 | tcctggcttctgggtggttaccagcaatcctgagtggtcctttcttgctt | 5947 |
| fugu  | 577  | -----                                              | 576  |
| human | 5948 | gtagtttcaacaatccagtatctgccttttgcttccacatggctgtctac | 5997 |
| fugu  | 577  | -----                                              | 576  |
| human | 5998 | catttgctctgtgtctccaaatctctctccttataaacacagcagttat  | 6047 |
| fugu  | 577  | -----                                              | 576  |

```
human      6048 tggattaggccccactctaataccagtatgacccccattttaacatgattac 6097
fugu       577 ----- 576
human      6098 acttatttctagataaggtcacattcacgtacaccaagggttaggaattg 6147
fugu       577 ----- 576
human      6148 aacatatctttttgggggacacaattcaaccacaagtgtcagtctctag 6197
fugu       577 ----- 576
human      6198 ctgagcctttcccttcctgtttttctccttttttagttgctatgggtagg 6247
fugu       577 ----- 576
human      6248 ggccaaatctccagtcataactagaattgcacatggactggatatttgga 6297
fugu       577 ----- 576
human      6298 atactgcgggtctattctatgagcttttagtatgtaacatttaatatcagt 6347
fugu       577 ----- 576
human      6348 gtaaagaagcccttttttaagttatttctttgaatttctaaatgtatgcc 6397
fugu       577 ----- 576
human      6398 ctgaatataagtaacaagttaccatgtcttgtaaaatgatcatatcaaca 6447
fugu       577 ----- 576
human      6448 aacatttaatgtgcacctactgtgctagttgaatgtctttatcctgatag 6497
fugu       577 ----- 576
human      6498 gagataacaggattccacatctttgacttaagaggacaaaccaaataatgt 6547
fugu       577 ----- 576
human      6548 ctaaatacatttgggggttttgatggatatctttaaattgctgaacctaatac 6597
fugu       577 ----- 576
human      6598 attggtttcatatgtcattgtttag 6622
fugu       577 ----- 576
```

```
#-----
#-----
</pre></body></html>
```
