# Supplementary material for: A comparative bioinformatic analysis of C9orf72
Source: PubMed Central journal article supplement (PMC5822839; doi:10.7717/peerj.4391), 2018-02-19
Supplement: peerj-06-4391-s008.pdf [file peerj-06-4391-s008.pdf]

```

<html><head></head><body><pre style="word-wrap: break-word; white-space: pre-
wrap;">#####
# Program: needle
# Rundate: Wed 24 Jan 2018 12:56:22
# Commandline: needle
#   -auto
#   -stdout
#   -asequence emboss_needle-I20180124-125619-0400-7777544-p2m.asequence
#   -bsequence emboss_needle-I20180124-125619-0400-7777544-p2m.bsequence
#   -datafile EDNAFULL
#   -gapopen 25.0
#   -gapextend 0.5
#   -endopen 10.0
#   -endextend 0.5
#   -aformat3 pair
#   -snucleotide1
#   -snucleotide2
# Align_format: pair
# Report_file: stdout
#####

```

```

#=====
#
# Aligned_sequences: 2
# 1: human
# 2: mouse
# Matrix: EDNAFULL
# Gap_penalty: 25.0
# Extend_penalty: 0.5
#
# Length: 10983
# Identity:      2870/10983 (26.1%)
# Similarity:   2870/10983 (26.1%)
# Gaps:         6829/10983 (62.2%)
# Score: 2781.5
#
#
#=====

```

```

human      1  gtgtgtcagccgctccctgctgcccggttgcttctcttttgggggcggggt      50
mouse      1  -----
human     51  ctagcaagagcagggtgtgggttaggaggtgtgtgtttttgtttttccca     100
mouse      1  -----
human     101  ccctctctccccactacttgctctcacagtactcgctgagggtgaacaag     150
mouse      1  -----
human     151  aaaagacctgataaagattaaccagaagaaaacaaggagggaacaaccg     200
mouse      1  -----
human     201  cagcctgtagcaagctctggaactcaggagtcgcgcgctaggggcccgggg     250
mouse      1  -----
human     251  ccggggccggggcggtggtcggggcgggcccggggcgggcccggggcggg     300
mouse      1  -----
human     301  gctgcggttgcggtgcctgcccgcggcggcggaggcgcaggcgggtggc     350
mouse      1  -----
human     351  gagtgggtgagtgaggaggcggcatcctggcgggtggctgtttggggttc     400
          |||||...|...|.....|.|||...|||...|  ||
mouse      1  -----gtgagtgagacgcgcgggcggaggggggctgctgccacgg--tc     42
human     401  ggctgccgggaag---aggcgcgggtagaagcgggg---gctctcctca     443
          |||...|||...|  .|...|...|...|...|...|  ..|||...|..
mouse      43  ggctcgcgggcccggccggctccgggtaccagcggggttttttctcttc     92

```



|       |      |                                                       |      |
|-------|------|-------------------------------------------------------|------|
| human | 820  | tttataatlaagggcccaaaagggacttggaaaataact-tlaagatagaatc | 874  |
| human | 1344 | tttctcagactttgggaaacttttaacataatctgtga-----           | 1381 |
| mouse | 875  | gtagtccac-ttggaaaactt-----aaaatatgagagagagagggggg     | 918  |
| human | 1382 | -----atatcacagaaacaagactatcatat                       | 1407 |
| mouse | 919  | ggggagagagagagagagagagagagagagaaaggaaggaagaaggaggaag  | 968  |
| human | 1408 | agggg-----atattaataacctggagtcagaatac                  | 1438 |
| mouse | 969  | aggaggaggaaagagattgagattatgttaataatatggaatcagaatat    | 1018 |
| human | 1439 | ttgaaatacgg-----gtcatttgacacgggcat-----               | 1468 |
| mouse | 1019 | ttgaaatatagtaagcgtcccctcagttaagaggacattccaggaggcc     | 1068 |
| human | 1469 | -----                                                 | 1468 |
| mouse | 1069 | cccagtatagcctgaaatctcaggaaacgcctacatacacccatcgtgtg    | 1118 |
| human | 1469 | -----tgttgtcac-----                                   | 1477 |
| mouse | 1119 | gatataggtgtttcccttcattacatttcatacacagatgttaaagttt     | 1168 |
| human | 1478 | -----                                                 | 1477 |
| mouse | 1169 | agaaagtaggcacaataagagattacaaataactgataataaagtcgagc    | 1218 |
| human | 1478 | -----                                                 | 1477 |
| mouse | 1219 | cattgcagctgctctgtaaaagtcctgtgaatgtgatcgctttgtgtttc    | 1268 |
| human | 1478 | -----cacctctgccaag-----                               | 1490 |
| mouse | 1269 | aaagtaacttactgtacttcaccctgttaagcaaaacaagattcacctg     | 1318 |
| human | 1491 | -----                                                 | 1490 |
| mouse | 1319 | aacgcaggcaccttggtaccttggcagacaccagatctgataaccaagag    | 1368 |
| human | 1491 | -----                                                 | 1490 |
| mouse | 1369 | gatggagaagtagtggcagacagtgaggagagcatgaatatgctagacaa    | 1418 |
| human | 1491 | -----                                                 | 1490 |
| mouse | 1419 | aagggtgaatcataacctaggagcagaaagcaggtatttcatcatcctcc    | 1468 |
| human | 1491 | -----                                                 | 1490 |
| mouse | 1469 | acagtaaaaacctatgtcacgtaaaaacctacaagtagtttttctttta     | 1518 |
| human | 1491 | -----gcctgc-----                                      | 1496 |
| mouse | 1519 | ctctttttgaatgaaagcttgctacaggcactgaaagttaaataatctg     | 1568 |
| human | 1497 | -----                                                 | 1496 |
| mouse | 1569 | tggatcaggaggaacaggggttttctgtctgagtcactgctgactagcac    | 1618 |
| human | 1497 | -----cactttaggaaaacctgaatcagttggaaactgc               | 1531 |
| mouse | 1619 | ctcagtgaccattggcactgtgggaaacccagagtcagttggaaacttc     | 1668 |
| human | 1532 | taca-----tgctgatagtacatctgaaac-aagaacgagag            | 1567 |
| mouse | 1669 | gaaactaaaggtgacgggtgttcttatttcatagaacacaaaaataagag    | 1718 |
| human | 1568 | taattaccacat---tccagattgttcactaagccagcattt-acctgc     | 1612 |
| mouse | 1719 | gggttacagcctgctgctgcagactggacattcaacaagcatttaaatttc   | 1768 |
| human | 1613 | tccaggaaaaaattacaagcaccttatgaagttgataaaaatattttgttt   | 1662 |







|       |      |                                                     |      |
|-------|------|-----------------------------------------------------|------|
| human | 3052 | -----                                               | 3051 |
| mouse | 4204 | ctattaccagccaataaccccattctataatttgctgtgcttcatctgg   | 4253 |
| human | 3052 | -----accaccacaccggctaatttttt---gta                  | 3078 |
| mouse | 4254 | gctgctcttaacttcagtcagccagcccacgtggccattattttaagatt  | 4303 |
| human | 3079 | ttttta-----                                         | 3084 |
| mouse | 4304 | tttttaccatagtgctcttctcactttactttacatttttctctctc     | 4353 |
| human | 3085 | -----                                               | 3084 |
| mouse | 4354 | ctcatggttctcctctgaccccaagcctaggaaccctaaaccccacccat  | 4403 |
| human | 3085 | -----gtagagggtggggtttcacca-----                     | 3104 |
| mouse | 4404 | gtctcttctgcccatctattggctgtaggcattttattcaccaatcagg   | 4453 |
| human | 3105 | -----tgttggccaggct-----ggtcttg-----                 | 3124 |
| mouse | 4454 | ataacttgagggaaggttaagtagtctcctgggtctaggtgctgtctct   | 4503 |
| human | 3125 | -----agctcctgacctc-----                             | 3137 |
| mouse | 4504 | gggagcaaccagtagtagcatagcaaaagaccagacctccacaatgatc   | 4553 |
| human | 3138 | -----aggtgatccacctgcctcggcctacca----                | 3164 |
| mouse | 4554 | actctgaccatcggggcagaaggcacctactagcctgtgccactcacctc  | 4603 |
| human | 3165 | -----aagagctgggata                                  | 3177 |
| mouse | 4604 | actttggtgaatcacatcttatcctgtagtggtatcactgcctgttatc   | 4653 |
| human | 3178 | acag-----gtgtgacc-----accatg                        | 3196 |
| mouse | 4654 | acaggaaaaagtgagtcacatcaataagatgtttcagaaagagaccatg   | 4703 |
| human | 3197 | cccgccatttttttttttcttattctgttaggagtga-----          | 3234 |
| mouse | 4704 | ttcatataattatcattctggtaagcttttaaatggttatattttgattat | 4753 |
| human | 3235 | -----                                               | 3234 |
| mouse | 4754 | aatctctttgttccatattttgcaaattataccttacagtaaataatatg  | 4803 |
| human | 3235 | -----                                               | 3234 |
| mouse | 4804 | catccaatggggtctttgaattcctccccggggagtaggaggactctttg  | 4853 |
| human | 3235 | -----                                               | 3234 |
| mouse | 4854 | aggatgggctgcatttaaagctaaacaacgcaacatgacctttagtcctt  | 4903 |
| human | 3235 | -----gagtgtaactagcag-----tataatagtt                 | 3259 |
| mouse | 4904 | atagatagcctagagatgagactaaataaaagaaatggtatataatgctt  | 4953 |
| human | 3260 | caattttcacaacgtgggt--aaaagtttccctataattcaatcagatttt | 3307 |
| mouse | 4954 | taagtttccaatcagcttaaaagcttttccctataaatctttaagattat  | 5003 |
| human | 3308 | gctccagggttcagttctgttttaggaaatacttttattttcagtttaat  | 3357 |
| mouse | 5004 | gctctggggctcaatactgcttcaagaagggtctttctt-----        | 5042 |
| human | 3358 | gatgaaatattagagttgtaaatattgcctttatgattatccaccttttta | 3407 |
| mouse | 5043 | -----ttgtatttagaattattcaccttttta                    | 5069 |
| human | 3408 | acctaaa----agaatgaaagaaaaatatgtttgcaatataattttatgg  | 3453 |
| mouse | 5070 | aacaaaaggagaaaatqqaatagaaatatgtttgcaacataattttatga  | 5119 |







|       |      |                                                            |      |
|-------|------|------------------------------------------------------------|------|
| mouse | 5918 | acatgt-----gtaaccctagctctggactggctctgag                    | 5951 |
| human | 5351 | cgtttatgttcttctcctcatgtctgttttctcattaaattcaaaggctt         | 5400 |
| mouse | 5952 | cttgtttgctcttctc-----tttt-----                             | 5971 |
| human | 5401 | gaacgggccctatntagcccttctgttttctacgtgttctaaataactaa         | 5450 |
| mouse | 5972 | -----gtggttctgagtaactga                                    | 5988 |
| human | 5451 | agcttttaaattctagccatttagtgtagaactctctttgcagtgatgaa         | 5500 |
| mouse | 5989 | aactctttcattttagcagcttagtat---gcgcccttcac-----a            | 6027 |
| human | 5501 | atgctgtattggtttcttggctagcatattaaatatttttatctttgtct         | 5550 |
| mouse | 6028 | ttgctgtgctgcctgctgcactaacattactcctttgcttatgttcccct         | 6077 |
| human | 5551 | tgatacttcaatgctcgttttaaacatcaggatcgggcttcagtattctca        | 5600 |
| mouse | 6078 | tcctgattcagtgctcattttaaagcagtagtactggacctcagta---cct       | 6124 |
| human | 5601 | taaccagagagttcactgaggatacaggactg-----                      | 5632 |
| mouse | 6125 | tagcc--ggagctcactgaggtgacagggctgaggctctgctgctgtctt         | 6172 |
| human | 5633 | -----tttgccattttttgttatggct---ccagacttg                    | 5664 |
| mouse | 6173 | ttgagcttacctctttttaatgttttatggatatttctgctgccaggtttg        | 6222 |
| human | 5665 | tggtatttccatgtctttttttttttttttttttttttttttttgaccttttagcggc | 5714 |
| mouse | 6223 | ggggttt---tgttttgttttgttttttgttttttg-----                  | 6255 |
| human | 5715 | tttaaagtatttctgttggttaggtgttgattacttttctaagattactt         | 5764 |
| mouse | 6256 | -----tttttttaattttctaggaacacct                             | 6281 |
| human | 5765 | aacaaagcaccacaaactgagtggtttaaacacagcaatttattctct           | 5814 |
| mouse | 6282 | agaaaa---cacaaactaggaaacttaaagagcagcgtcttgttccct           | 6327 |
| human | 5815 | cacaattctagaagctagaagtcgaaatcaaagt---gttgacagggg           | 5860 |
| mouse | 6328 | --gcgttctagaaagtccaagcctaagccagtgatggtgtcaggaa             | 6375 |
| human | 5861 | catgatcttcaagagagaagact-----ctttccttgccctcttcc             | 5900 |
| mouse | 6376 | catgagcctc-----tgaaggcttcttgggaaaccttcttgtctcaac-          | 6419 |
| human | 5901 | tggcttctgggtggttaccagcaatcctgagtgttcctttcttgccttgta        | 5950 |
| mouse | 6420 | --acctctgggtggcaagcagtagtcc---atggtactctct--ctgtcca        | 6462 |
| human | 5951 | gtttcaacaatccagtatctgccttttgccttcacatggctgtctacat          | 6000 |
| mouse | 6463 | cggtcagcatcccagtccttgcctttatctttgtgcagccgaccagctt          | 6512 |
| human | 6001 | ttgtct-ctgtgtctccaaat-----ctctctccttataaaca                | 6037 |
| mouse | 6513 | tgcttttagtctgtctccttctcaggtctccttccccgctcctcttaagca        | 6562 |
| human | 6038 | cagcagttattggattaggccccactctaataccagtatgacccatttta         | 6087 |
| mouse | 6563 | cagcagtcattggattagagcccatccttccctcggatggccc--atattg        | 6610 |
| human | 6088 | acatgattacacttatttctagataaggtcacattcacgtacaccaaggg         | 6137 |
| mouse | 6611 | acctaattttacgtatttgaactaaggtcccatttacttaca-----            | 6653 |
| human | 6138 | ttaggaattgaacatatctttttgggggacacaattcaaccacaagtgt          | 6187 |
| mouse | 6654 | -----                                                      | 6653 |
| human | 6188 | cagtctctagctgagcctttcccttccctgtttttctccttttttagttgct       | 6237 |



|       |      |                                                      |      |
|-------|------|------------------------------------------------------|------|
| human | 6623 | -----                                                | 6622 |
| mouse | 7383 | cttttgagcttgatcatggttagcctggccaatgaaagtttttttctggta  | 7432 |
| human | 6623 | -----                                                | 6622 |
| mouse | 7433 | cagttacacttaagttttggaaattatatgctgctaacaccagacagctg   | 7482 |
| human | 6623 | -----                                                | 6622 |
| mouse | 7483 | ttatgttgtgtctcctgggcacagaaagccctgctctcatgcctggggtc   | 7532 |
| human | 6623 | -----                                                | 6622 |
| mouse | 7533 | ttcacagtcctaataaggaaagtaagatcttataaacattgtgtctgagttt | 7582 |
| human | 6623 | -----                                                | 6622 |
| mouse | 7583 | gttctggaagctgtgactctaccttcttgttttcctttccctgtgtgact   | 7632 |
| human | 6623 | -----                                                | 6622 |
| mouse | 7633 | ttgtcctttgcttacaacagtgcaaaagtataaatattctcagattttga   | 7682 |
| human | 6623 | -----                                                | 6622 |
| mouse | 7683 | taagctgtcagccacacagccttagtaactaagctgctgtcccacgctcc   | 7732 |
| human | 6623 | -----                                                | 6622 |
| mouse | 7733 | cagttctgtataacgaggatggaccaattagattctaaggagttattcct   | 7782 |
| human | 6623 | -----                                                | 6622 |
| mouse | 7783 | ttcaatttgcaaattagctaaaggaaatattgttttctcctgatattta    | 7832 |
| human | 6623 | -----                                                | 6622 |
| mouse | 7833 | cattgcttttcattttcagcatatctaaagaacaaacctaattctccttc   | 7882 |
| human | 6623 | -----                                                | 6622 |
| mouse | 7883 | ctactttctagtttaataataatcctaaaaatccattaaaacatgactaat  | 7932 |
| human | 6623 | -----                                                | 6622 |
| mouse | 7933 | tctataaggcctctaacctacaaaggggaagtagcattttgaaaagaatag  | 7982 |
| human | 6623 | -----                                                | 6622 |
| mouse | 7983 | ttttctctattataacctattcatgcagacttccttccttattttctgacat | 8032 |
| human | 6623 | -----                                                | 6622 |
| mouse | 8033 | acttaacaaaaatcatttagattcaaacagtttagctgcaggtgatatta   | 8082 |
| human | 6623 | -----                                                | 6622 |
| mouse | 8083 | cagacaagtaatcccagtgctctatctagctctgaggcaaaaggatttgag  | 8132 |
| human | 6623 | -----                                                | 6622 |
| mouse | 8133 | ctcagtgccagcctgttctatctacctggtgagttccagtcccataaata   | 8182 |
| human | 6623 | -----                                                | 6622 |
| mouse | 8183 | aacaaactaaaacaaccgttcctctgttcctcagatgagagtcgatcttg   | 8232 |
| human | 6623 | -----                                                | 6622 |
| mouse | 8233 | tttgatttaaatagtgtgtaattattttcttttgaagctgcaggtgttat   | 8282 |
| human | 6623 | -----                                                | 6622 |
| mouse | 8283 | gtgggctgttttagactaaattctctctttactgtggagtaaagggtgct   | 8332 |

```
human      6623 ----- 6622
mouse     8333 gtgattgtatttcatggttctctgcgagagcttgaacttgttgggctaatac 8382
human      6623 ----- 6622
mouse     8383 gcttgtctccatcctgtctccccacctgcgtaaaaagtattttcctgtga 8432
human      6623 ----- 6622
mouse     8433 gctgtacatgatagagcatatctacattgaaaaatgaacgagcatcaaaa 8482
human      6623 ----- 6622
mouse     8483 tggatttgtaaagtaaattttctttttcttag 8515
```

```
#-----
#-----
```

```
</pre></body></html>
```
