# Supplementary material for: A comparative bioinformatic analysis of C9orf72
Source: PubMed Central journal article supplement (PMC5822839; doi:10.7717/peerj.4391), 2018-02-19
Supplement: peerj-06-4391-s009.pdf [file peerj-06-4391-s009.pdf]

```
human      3694 GAATTTTGGAAATTACAAATACACGTGTTAAAACCTGTCGTTGTGTTCAAC 3743
          |||||.|||||.|||||.|||.|||.|||.|||.|||.|||.|||.|||.|||.
mouse     5354 GAATTTCTGAAATTAAAATGAACATTTAAAACCTCTAGGT-----AAA 5397

human      3744 CATTTCTGTACATACTTAGAGTTAACTGTTTTGCCAGGCTCTGTATGCCT 3793
          |..|||          |||||.|||||.|||.|||.|||.|||.|||.|||.
mouse     5398 CTATTC-----CTTAGAGTTAAGTGTTTTGCCAAGTTCTGT----- 5433

human      3794 ACTCATAATATGATAAAAGCACTCATCTAATGCTCTGTAAATAGAAGTCA 3843
          |.|||||.|||||.|||.|||.|||.|||.|||.|||.|||.|||.|||.
mouse     5434 AATCATAATATGATAGAAACGCTCACTCAGCATTCTAAATATAGAAGTTA 5483

human      3844 GTGCTTTCATCAGACTGAACTCTCTTGACAAGATGTGGA 3883
          .|.|||.|||.|||.|||.|||.|||.|||.|||.|||.|||.
mouse     5484 CTCCTTCGCATGACTCTAAT-TCTTGATAAGGTGGAGA 5522
```

```
#-----
#-----
</pre></body></html>
```
