# Supplementary material for: A comparative bioinformatic analysis of C9orf72
Source: PubMed Central journal article supplement (PMC5822839; doi:10.7717/peerj.4391), 2018-02-19

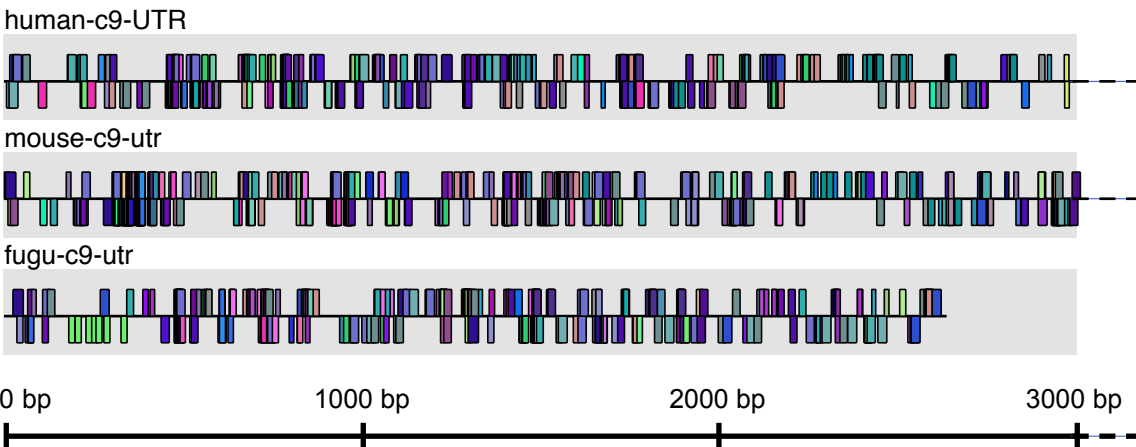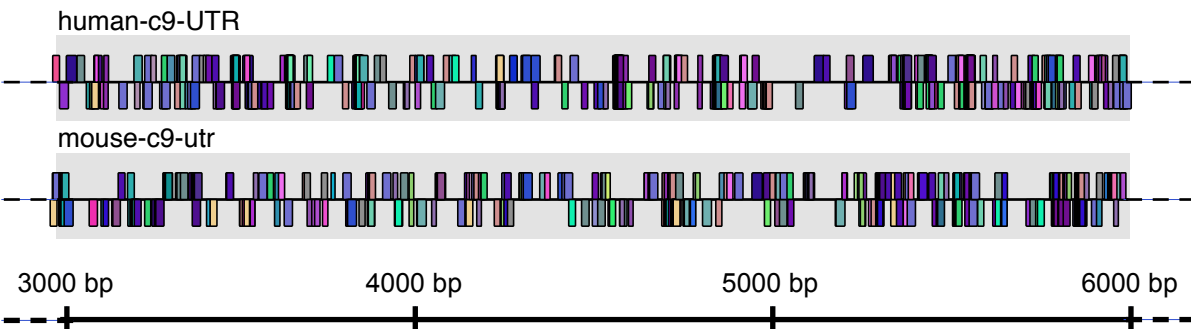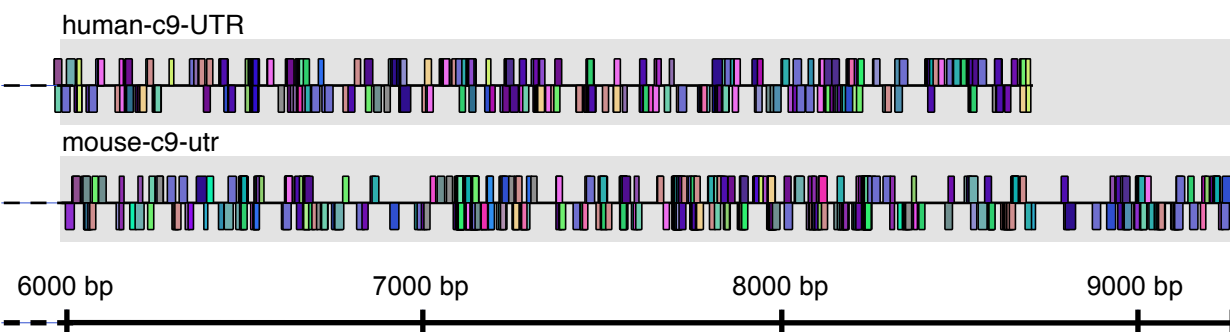

**Matrix families:**

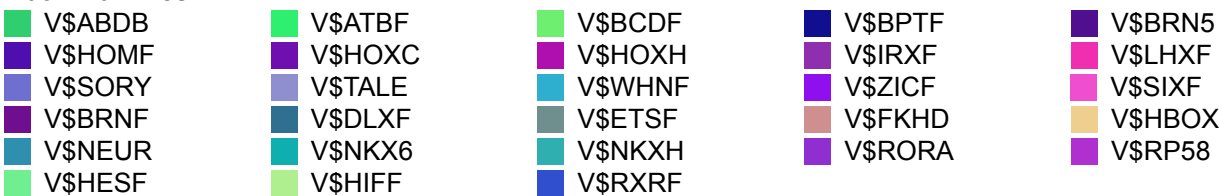

Supplement: peerj-06-4391-s010.pdf [file peerj-06-4391-s010.pdf]
